# Supplementary material
Source: publisher figshare collection journal article supplement (https://acs.figshare.com/ndownloader/files/22804946)

# checkCIF/PLATON report

Structure factors have been supplied for datablock(s) mjl18140\_0m

THIS REPORT IS FOR GUIDANCE ONLY. IF USED AS PART OF A REVIEW PROCEDURE FOR PUBLICATION, IT SHOULD NOT REPLACE THE EXPERTISE OF AN EXPERIENCED CRYSTALLOGRAPHIC REFEREE.

No syntax errors found.      CIF dictionary      Interpreting this report

## Datablock: mjl18140\_0m

---

Bond precision:    C-C = 0.0198 Å                      Wavelength=1.34139

Cell:                      a=36.270(2)              b=7.8548(4)              c=36.2929(17)  
                            alpha=90              beta=113.602(3)              gamma=90  
Temperature:              170 K

|                | Calculated         | Reported           |
|----------------|--------------------|--------------------|
| Volume         | 9474.7(9)          | 9474.6(9)          |
| Space group    | C 2/c              | C 1 2/c 1          |
| Hall group     | -C 2yc             | -C 2yc             |
| Moiety formula | C21 H36 Ir N O2 P2 | C21 H36 Ir N O2 P2 |
| Sum formula    | C21 H36 Ir N O2 P2 | C21 H36 Ir N O2 P2 |
| Mr             | 588.67             | 588.65             |
| Dx,g cm-3      | 1.651              | 1.651              |
| Z              | 16                 | 16                 |
| Mu (mm-1)      | 8.155              | 8.479              |
| F000           | 4672.0             | 4672.0             |
| F000'          | 4595.02            |                    |
| h,k,lmax       | 44,9,44            | 44,9,44            |
| Nref           | 9100               | 8847               |
| Tmin,Tmax      | 0.774,0.844        | 0.457,0.751        |
| Tmin'          | 0.408              |                    |

Correction method= # Reported T Limits: Tmin=0.457 Tmax=0.751  
AbsCorr = MULTI-SCAN

Data completeness= 0.972                      Theta(max)= 55.119

R(reflections)= 0.0708( 6205)              wR2(reflections)= 0.1670( 8847)

S = 1.032                      Npar= 505

---



The following ALERTS were generated. Each ALERT has the format

**test-name\_ALERT\_alert-type\_alert-level.**

Click on the hyperlinks for more details of the test.

---

### Alert level A

PLAT973\_ALERT\_2\_A Check Calcd Positive Resid. Density on Ir1 2.18 eA-3

**Author Response: Inadequate absorption correction of iridium which strongly absorbs X-r**

---

### Alert level B

PLAT973\_ALERT\_2\_B Check Calcd Positive Resid. Density on Ir2 1.82 eA-3

**Author Response: Inadequate absorption correction of iridium which strongly absorbs X-r**

---

### Alert level C

PLAT051\_ALERT\_1\_C Mu(calc) and Mu(CIF) Ratio Differs from 1.0 by . 3.82 %  
 PLAT234\_ALERT\_4\_C Large Hirshfeld Difference Ir1 --C2 . 0.16 Ang.  
 PLAT234\_ALERT\_4\_C Large Hirshfeld Difference C40 --C41 . 0.17 Ang.  
 PLAT342\_ALERT\_3\_C Low Bond Precision on C-C Bonds ..... 0.01977 Ang.  
 PLAT906\_ALERT\_3\_C Large K Value in the Analysis of Variance ..... 5.601 Check  
 PLAT911\_ALERT\_3\_C Missing FCF Refl Between Thmin & STh/L= 0.600 166 Report  
 PLAT971\_ALERT\_2\_C Check Calcd Resid. Dens. 0.96A From Ir1 2.04 eA-3  
 PLAT971\_ALERT\_2\_C Check Calcd Resid. Dens. 1.02A From Ir1 1.89 eA-3  
 PLAT971\_ALERT\_2\_C Check Calcd Resid. Dens. 1.13A From Ir1 1.72 eA-3  
 PLAT971\_ALERT\_2\_C Check Calcd Resid. Dens. 1.15A From Ir2 1.57 eA-3  
 PLAT971\_ALERT\_2\_C Check Calcd Resid. Dens. 0.99A From Ir2 1.55 eA-3  
 PLAT971\_ALERT\_2\_C Check Calcd Resid. Dens. 1.02A From C22 1.52 eA-3  
 PLAT977\_ALERT\_2\_C Check Negative Difference Density on H33B -0.44 eA-3  
 PLAT978\_ALERT\_2\_C Number C-C Bonds with Positive Residual Density. 0 Info

---

### Alert level G

ABSMU01\_ALERT\_1\_G Calculation of \_exptl\_absorpt\_correction\_mu  
 not performed for this radiation type.  
 PLAT083\_ALERT\_2\_G SHELXL Second Parameter in WGHT Unusually Large 409.09 Why ?  
 PLAT802\_ALERT\_4\_G CIF Input Record(s) with more than 80 Characters 1 Info  
 PLAT910\_ALERT\_3\_G Missing # of FCF Reflection(s) Below Theta(Min). 3 Note  
 PLAT912\_ALERT\_4\_G Missing # of FCF Reflections Above STh/L= 0.600 84 Note  
 PLAT933\_ALERT\_2\_G Number of OMIT Records in Embedded .res File ... 152 Note  
 PLAT984\_ALERT\_1\_G The C-f'= 0.0148 Deviates from the B&C-Value 0.0137 Check  
 PLAT984\_ALERT\_1\_G The Ir-f'= -5.4392 Deviates from the B&C-Value -5.7005 Check  
 PLAT984\_ALERT\_1\_G The O-f'= 0.0412 Deviates from the B&C-Value 0.0389 Check  
 PLAT984\_ALERT\_1\_G The P-f'= 0.2596 Deviates from the B&C-Value 0.2543 Check  
 PLAT985\_ALERT\_1\_G The Ir-f"= 5.4712 Deviates from the B&C-Value 5.2682 Check  
 PLAT985\_ALERT\_1\_G The P-f"= 0.3354 Deviates from the B&C-Value 0.3332 Check

- 
- 1 **ALERT level A** = Most likely a serious problem - resolve or explain
  - 1 **ALERT level B** = A potentially serious problem, consider carefully
  - 14 **ALERT level C** = Check. Ensure it is not caused by an omission or oversight
  - 12 **ALERT level G** = General information/check it is not something unexpected



8 ALERT type 1 CIF construction/syntax error, inconsistent or missing data  
12 ALERT type 2 Indicator that the structure model may be wrong or deficient  
4 ALERT type 3 Indicator that the structure quality may be low  
4 ALERT type 4 Improvement, methodology, query or suggestion  
0 ALERT type 5 Informative message, check

---

It is advisable to attempt to resolve as many as possible of the alerts in all categories. Often the minor alerts point to easily fixed oversights, errors and omissions in your CIF or refinement strategy, so attention to these fine details can be worthwhile. In order to resolve some of the more serious problems it may be necessary to carry out additional measurements or structure refinements. However, the purpose of your study may justify the reported deviations and the more serious of these should normally be commented upon in the discussion or experimental section of a paper or in the "special\_details" fields of the CIF. checkCIF was carefully designed to identify outliers and unusual parameters, but every test has its limitations and alerts that are not important in a particular case may appear. Conversely, the absence of alerts does not guarantee there are no aspects of the results needing attention. It is up to the individual to critically assess their own results and, if necessary, seek expert advice.

### **Publication of your CIF in IUCr journals**

A basic structural check has been run on your CIF. These basic checks will be run on all CIFs submitted for publication in IUCr journals (*Acta Crystallographica*, *Journal of Applied Crystallography*, *Journal of Synchrotron Radiation*); however, if you intend to submit to *Acta Crystallographica Section C* or *E* or *IUCrData*, you should make sure that full publication checks are run on the final version of your CIF prior to submission.

### **Publication of your CIF in other journals**

Please refer to the *Notes for Authors* of the relevant journal for any special instructions relating to CIF submission.

---

**PLATON version of 22/12/2019; check.def file version of 13/12/2019**



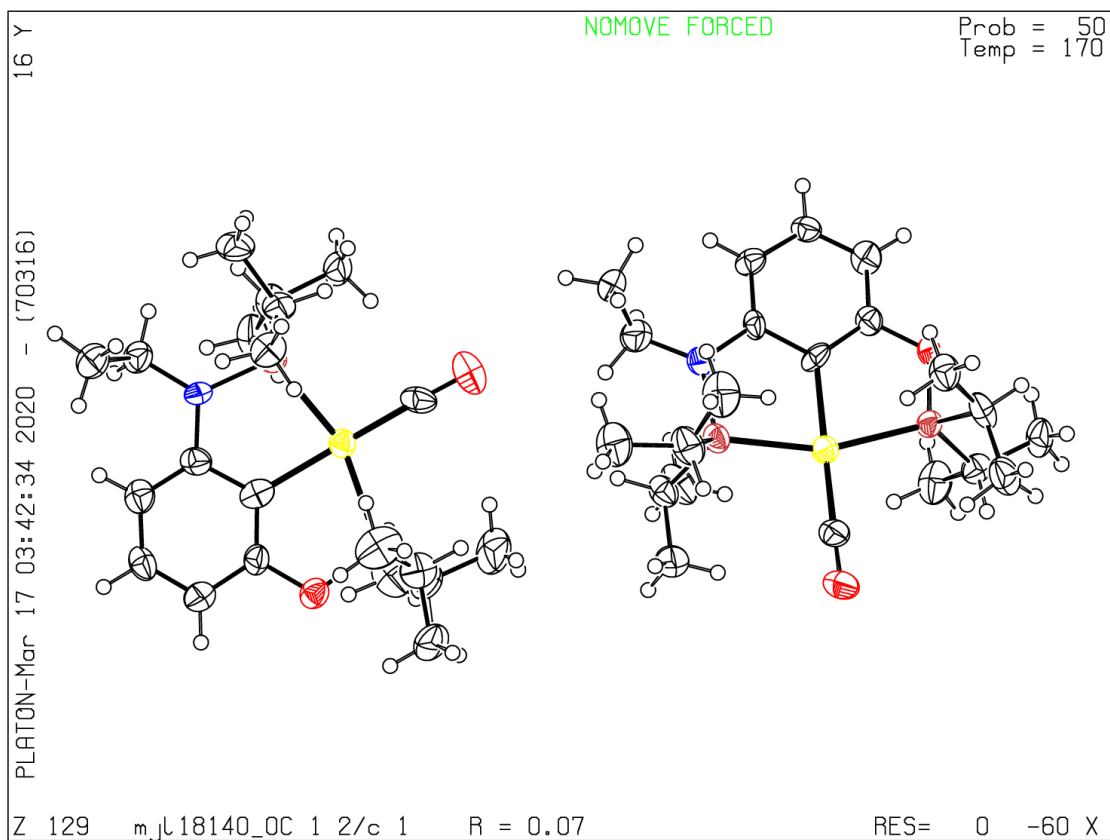

Supplement: Supplementary file 1 [file 22804946]
